# Supplementary material for: The untapped potential of plant sesterterpenoids: chemistry, biological activities and biosynthesis
Source: Royal Society of Chemistry journal article supplement (doi:10.1039/d1np00021g), 2021-01-01
Supplement: d1np00021g1.pdf [file d1np00021g1.pdf]

## Supporting Information for

# The untapped potential of plant sesterterpenoids: chemistry, biological activities and biosynthesis

Kai Guo,<sup>a,†</sup> Yan Liu,<sup>a,b,†</sup> and Sheng-Hong Li<sup>\*a,b</sup>

<sup>a</sup> State Key Laboratory of Southwestern Chinese Medicine Resources, and Innovative Institute of Chinese Medicine and Pharmacy, Chengdu University of Traditional Chinese Medicine, Chengdu 611137, P. R. China.

<sup>b</sup> State Key Laboratory of Phytochemistry and Plant Resources in West China, and Yunnan Key Laboratory of Natural Medicinal Chemistry, Kunming Institute of Botany, Chinese Academy of Sciences, Kunming 650201, P. R. China.

<sup>†</sup> These authors contributed equally.

E-mail: [shli@mail.kib.ac.cn](mailto:shli@mail.kib.ac.cn)

## **Contents of Supporting Information**

Figure S1. Compilation of all the reported structures

Table S1. Names, Sources and Bioactivities of the Compounds

**Figure S1. Compilation of all the reported structures**

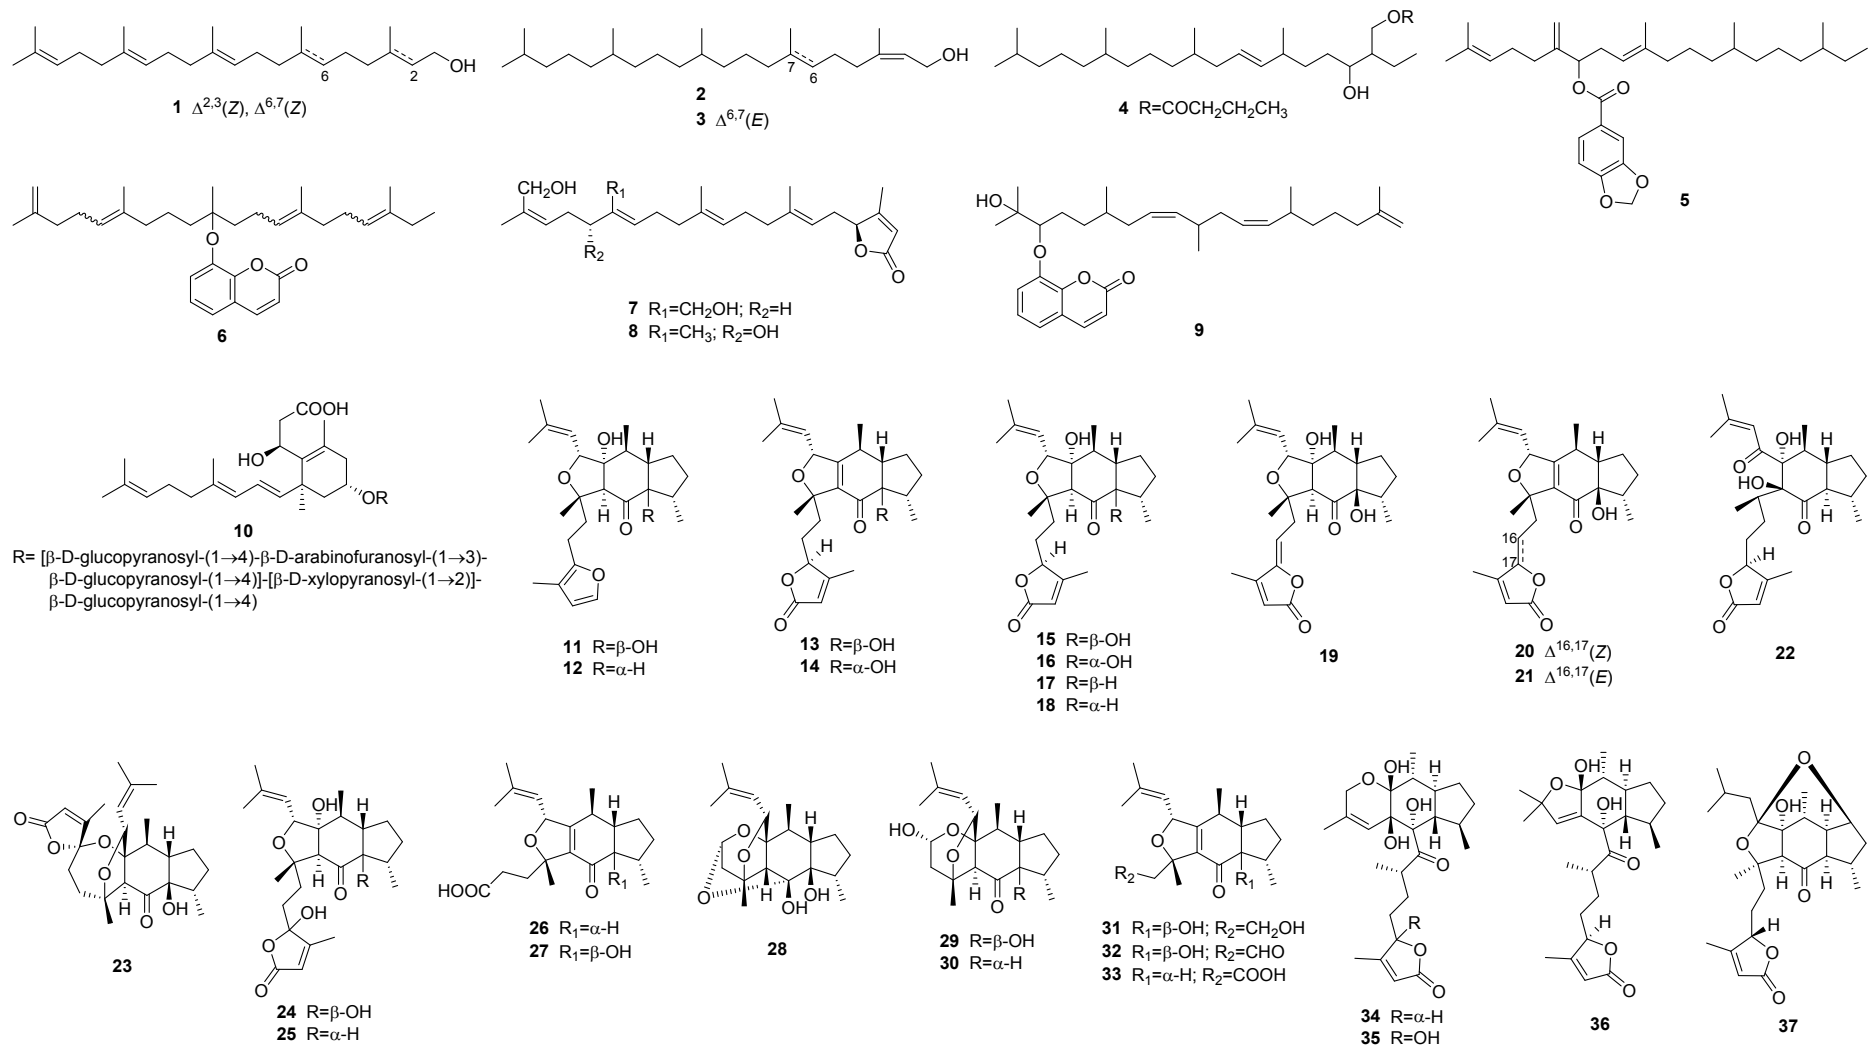

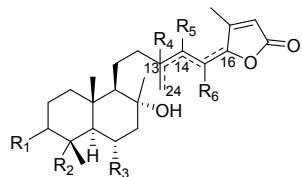

- 41  $R_1=R_5=R_6=H$ ;  $R_2=COOCH_3$ ;  $R_3=OH$ ;  $16R$ ,  $\Delta^{13,14}(E)$   
 42  $R_1=R_6=H$ ;  $R_2=COOCH_3$ ;  $R_3=OH$ ;  $R_5=OOH$ ;  $\Delta^{13,24}$   
 43  $R_1=R_5=R_6=H$ ;  $R_2=COOCH_3$ ;  $R_3=OH$ ;  $R_4=OOH$ ;  $\Delta^{14,15}(E)$   
 45  $R_1=\alpha-OH$ ;  $R_2=CH_2OH$ ;  $R_5=R_6=H$ ;  $\Delta^{13,14}(E)$   
 46  $R_1=R_3=R_5=R_6=H$ ;  $R_2=COOH$ ;  $16R$ ,  $\Delta^{13,14}(E)$   
 47  $R_1=R_3=R_6=H$ ;  $R_2=COOH$ ;  $R_4=R_5=OH(threo)$ ;  $\Delta^{15,16}(E)$   
 48  $R_1=R_3=R_6=H$ ;  $R_2=COOH$ ;  $R_4=R_5=OH(erythro)$ ;  $\Delta^{15,16}(E)$   
 49  $R_1=OH$ ;  $R_2=CH_3$ ;  $R_3=R_6=H$ ;  $R_4=R_5=OH(erythro)$ ;  $\Delta^{15,16}(E)$   
 50  $R_1=R_5=H$ ;  $R_2=CH_2OH$ ;  $R_3=R_6=OH$ ;  $16R$ ,  $\Delta^{13,14}(E)$   
 51  $R_1=R_5=R_6=H$ ;  $R_2=CH_2OH$ ;  $R_3=OH$ ;  $16R$ ,  $\Delta^{13,14}(E)$   
 52  $R_1=R_5=H$ ;  $R_2=CH_3$ ;  $R_3=R_6=OH$ ;  $16R$ ,  $\Delta^{13,14}(E)$   
 53  $R_1=R_5=H$ ;  $R_2=COOH$ ;  $R_3=R_6=OH$ ;  $16R$ ,  $\Delta^{13,14}(E)$   
 54  $R_1=R_5=R_6=H$ ;  $R_2=COOH$ ;  $R_3=OH$ ;  $16R$ ,  $\Delta^{13,14}(E)$   
 55  $R_1=R_5=H$ ;  $R_2=COOCH_3$ ;  $R_3=R_6=OH$ ;  $16R$ ,  $\Delta^{13,14}(E)$   
 56  $R_1=R_5=H$ ;  $R_2=CHO$ ;  $R_3=R_6=OH$ ;  $16R$ ,  $\Delta^{13,14}(E)$   
 57  $R_1=R_5=R_6=H$ ;  $R_2=CHO$ ;  $R_3=OH$ ;  $16R$ ,  $\Delta^{13,14}(E)$   
 58  $R_1=R_5=R_6=H$ ;  $R_2=CH_2OH$ ;  $R_3=OH$ ;  $\Delta^{13,14}(E)$ ,  $\Delta^{15,16}(Z)$   
 59  $R_1=R_5=R_6=H$ ;  $R_2=COOH$ ;  $R_3=OH$ ;  $\Delta^{13,14}(E)$ ,  $\Delta^{15,16}(Z)$   
 60  $R_1=R_5=R_6=H$ ;  $R_2=CHO$ ;  $R_3=OH$ ;  $\Delta^{13,14}(E)$ ,  $\Delta^{15,16}(Z)$   
 61  $R_1=H$ ;  $R_2=CH_2OH$ ;  $R_3=OH$ ;  $R_5=R_6=OH(erythro)$ ;  $\Delta^{13,24}$   
 62  $R_1=H$ ;  $R_2=CH_2OH$ ;  $R_3=OH$ ;  $R_5=R_6=OH(threo)$ ;  $\Delta^{13,24}$   
 63  $R_1=H$ ;  $R_2=CHO$ ;  $R_3=OH$ ;  $R_5=R_6=OH(erythro)$ ;  $\Delta^{13,24}$   
 66  $R_1=R_3=R_5=R_6=H$ ;  $R_2=COOCH_3$ ;  $16R$ ,  $\Delta^{13,14}(E)$   
 69  $R_1=R_3=R_5=H$ ;  $R_2=COOCH_3$ ;  $R_6=OH$ ;  $16R$ ,  $\Delta^{13,14}(E)$   
 70  $R_1=R_3=R_5=R_6=H$ ;  $R_2=CH_2OH$ ;  $\Delta^{13,14}(E)$

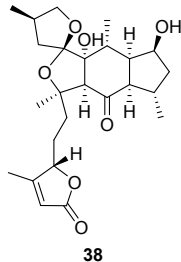

38

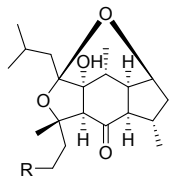

39  $R=COOH$   
 40  $R=OH$

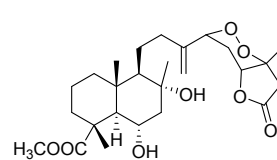

44

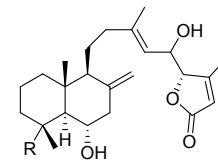

64  $R=CH_2OH$   
 65  $R=CHO$

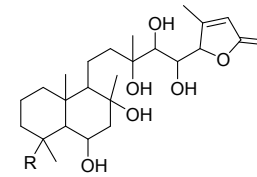

66  $R=CH_2OH$   
 67  $R=CHO$

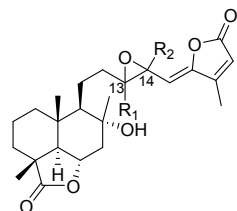

72  $R_1=\alpha-CH_3$ ;  $R_2=\beta-H$   
 73  $R_1=\beta-CH_3$ ;  $R_2=\beta-H$   
 74  $R_1=\beta-CH_3$ ;  $R_2=\alpha-H$

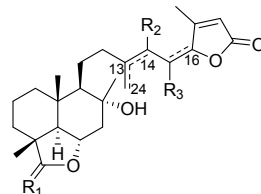

- 75  $R_1=O$ ;  $R_2=OOH$ ;  $R_3=H$ ;  $\Delta^{13,24}$   
 76  $R_1=O$ ;  $R_2=H$ ;  $R_3=H$ ;  $\Delta^{13,14}(E)$   
 78  $R_1=H$ ,  $H$ ;  $R_2=H$ ;  $R_3=OH$ ;  $16R$ ,  $\Delta^{13,14}(E)$   
 79  $R_1=O$ ;  $R_2=H$ ;  $R_3=OH$ ;  $16R$ ,  $\Delta^{13,14}(E)$   
 80  $R_1=OH$ ,  $H$ ;  $R_2=H$ ;  $R_3=OH$ ;  $16R$ ,  $\Delta^{13,14}(E)$   
 81  $R_1=OEt$ ,  $H$ ;  $R_2=H$ ;  $R_3=OH$ ;  $16R$ ,  $\Delta^{13,14}(E)$   
 82  $R_1=OEt$ ,  $H$ ;  $R_2=H$ ;  $R_3=H$ ;  $16R$ ,  $\Delta^{13,14}(E)$   
 83  $R_1=O$ ;  $R_2=H$ ;  $R_3=H$ ;  $\Delta^{13,14}(E)$ ,  $\Delta^{15,16}(Z)$   
 84  $R_1=O$ ;  $R_2=H$ ;  $R_3=H$ ;  $\Delta^{13,14}(E)$ ,  $\Delta^{15,16}(Z)$   
 86  $R_1=O$ ;  $R_2=OH$ ;  $R_3=H$ ;  $\Delta^{13,24}$   
 88  $R_1=OCH_3$ ,  $H$ ;  $R_2=H$ ;  $R_3=H$ ;  $\Delta^{13,14}(E)$   
 89  $R_1=OCH_3$ ,  $H$ ;  $R_2=H$ ;  $R_3=OH$ ;  $16R$ ,  $\Delta^{13,14}(E)$   
 90  $R_1=OH$ ,  $H$ ;  $R_2=H$ ;  $R_3=H$ ;  $\Delta^{13,14}(E)$

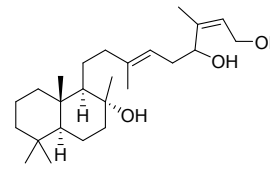

71

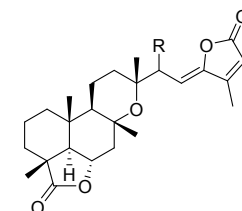

85  $R=\alpha-OH$   
 87  $R=\beta-OH$

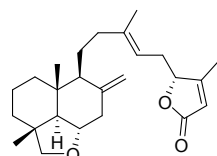

77

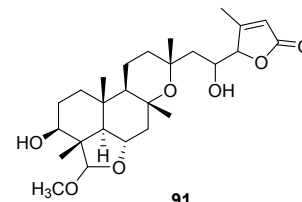

91

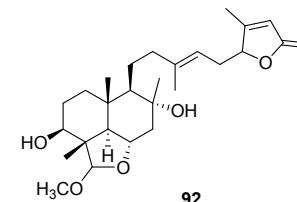

92

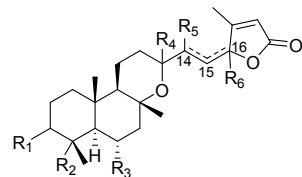

- 94  $R_1=\beta-OH$ ;  $R_2=CH_3$ ;  $R_3=H$ ;  $R_4=\beta-CH_3$ ;  $R_5=H$ ;  $\Delta^{15,16}(Z)$   
 95  $R_1=\alpha-OH$ ;  $R_2=CH_3$ ;  $R_3=H$ ;  $R_4=\beta-CH_3$ ;  $R_5=H$ ;  $R_6=OCH_3$ ;  $\Delta^{14,15}(E)$   
 96  $R_1=\alpha-OH$ ;  $R_2=CH_3$ ;  $R_3=H$ ;  $R_4=\alpha-CH_3$ ;  $R_5=H$ ;  $R_6=OCH_3$ ;  $\Delta^{14,15}(E)$   
 97  $R_1=H$ ;  $R_2=CH_3$ ;  $R_3=OH$ ;  $R_4=\beta-CH_3$ ;  $R_5=OH$ ;  $\Delta^{15,16}(Z)$   
 98  $R_1=H$ ;  $R_2=CH_3$ ;  $R_3=OH$ ;  $R_4=\beta-CH_3$ ;  $R_5=H$ ;  $R_6=OH$ ;  $\Delta^{14,15}(E)$   
 99  $R_1=H$ ;  $R_2=CH_3$ ;  $R_3=OH$ ;  $R_4=\beta-CH_3$ ;  $R_5=OH$ ;  $\Delta^{15,16}(E)$   
 100  $R_1=H$ ;  $R_2=CH_3$ ;  $R_3=OH$ ;  $R_4=\alpha-CH_3$ ;  $R_5=OH$ ;  $\Delta^{15,16}(Z)$   
 101  $R_1=H$ ;  $R_2=CH_3$ ;  $R_3=OH$ ;  $R_4=\alpha-CH_3$ ;  $R_5=H$ ;  $R_6=OH$ ;  $\Delta^{14,15}(E)$   
 102  $R_1=H$ ;  $R_2=COOH$ ;  $R_3=H$ ;  $R_4=\alpha-CH_3$ ;  $R_5=\beta-OH$ ;  $\Delta^{15,16}(Z)$   
 103  $R_1=H$ ;  $R_2=COOH$ ;  $R_3=H$ ;  $R_4=\beta-CH_3$ ;  $R_5=\beta-OH$ ;  $\Delta^{15,16}(Z)$   
 104  $R_1=H$ ;  $R_2=COOH$ ;  $R_3=H$ ;  $R_4=\alpha-CH_3$ ;  $R_5=\alpha-OH$ ;  $\Delta^{15,16}(Z)$   
 105  $R_1=H$ ;  $R_2=COOH$ ;  $R_3=H$ ;  $R_4=\alpha-CH_3$ ;  $R_5=OH$ ;  $R_6=\beta-H$   
 106  $R_1=H$ ;  $R_2=COOH$ ;  $R_3=H$ ;  $R_4=\beta-CH_3$ ;  $R_5=H$ ;  $\Delta^{15,16}(Z)$   
 107  $R_1=H$ ;  $R_2=COAc$ ;  $R_3=OH$ ;  $R_4=\beta-CH_3$ ;  $R_5=\beta-OH$ ;  $\Delta^{15,16}(Z)$   
 108  $R_1=H$ ;  $R_2=COAc$ ;  $R_3=OH$ ;  $R_4=\beta-CH_3$ ;  $R_5=\alpha-OH$ ;  $\Delta^{15,16}(Z)$

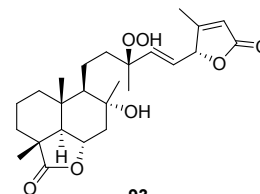

93

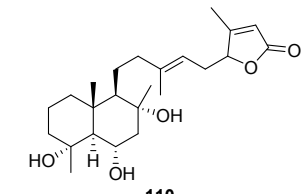

110

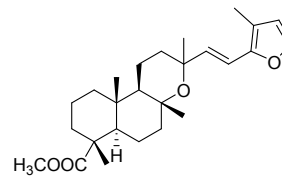

109

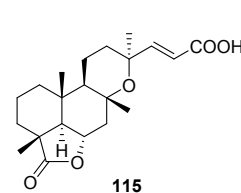

115

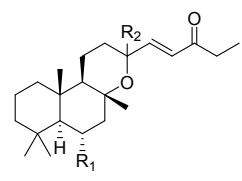

111  $R_1=OH$ ;  $R_2=\beta-CH_3$   
 112  $R_1=OH$ ;  $R_2=\alpha-CH_3$   
 113  $R_1=H$ ;  $R_2=\beta-CH_3$   
 114  $R_1=H$ ;  $R_2=\alpha-CH_3$

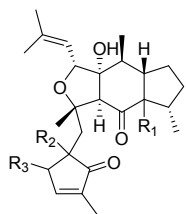

**116** R<sub>1</sub>=β-OH; R<sub>2</sub>=β-H; R<sub>3</sub>=β-OH  
**117** R<sub>1</sub>=α-H; R<sub>2</sub>=α-H; R<sub>3</sub>=α-OH

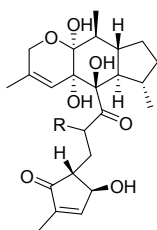

**118** R=β-CH<sub>3</sub>  
**119** R=α-CH<sub>3</sub>

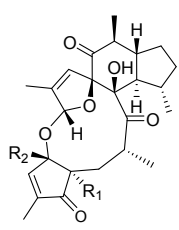

**120** R<sub>1</sub>=α-H; R<sub>2</sub>=β-H  
**121** R<sub>1</sub>=β-H; R<sub>2</sub>=α-H

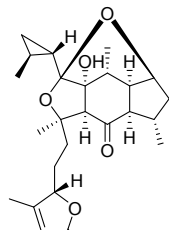

**122**

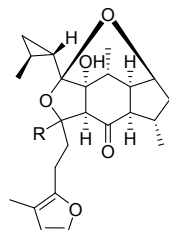

**123** R=β-Me  
**124** R=α-Me

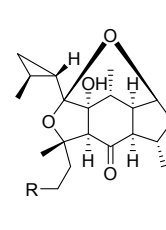

**125** R=COOH  
**126** R=OH

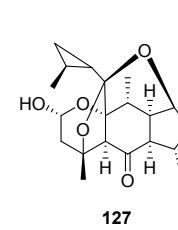

**127**

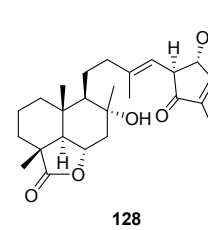

**128**

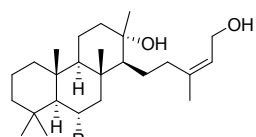

**129** R=OH  
**130** R=H

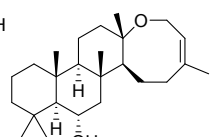

**131**

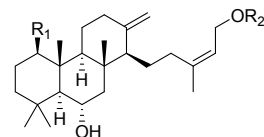

**132** R<sub>1</sub>=R<sub>2</sub>=H  
**133** R<sub>1</sub>=OH; R<sub>2</sub>=H  
**134** R<sub>1</sub>=OH; R<sub>2</sub>=Ac

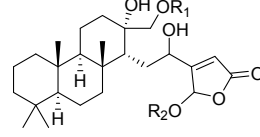

**135** R<sub>1</sub>=R<sub>2</sub>=Ac  
**136** R<sub>1</sub>=H; R<sub>2</sub>=Ac  
**137** R<sub>1</sub>=Ac; R<sub>2</sub>=*trans*-cinnamoyl  
**138** R<sub>1</sub>=H; R<sub>2</sub>=*trans*-cinnamoyl

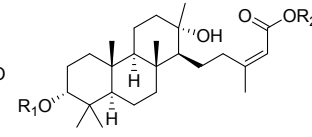

**139** R<sub>1</sub>=COCH<sub>2</sub>COOH; R<sub>2</sub>=CH<sub>3</sub>  
**140** R<sub>1</sub>=COCH<sub>2</sub>COOH; R<sub>2</sub>=H  
**141** R<sub>1</sub>=H; R<sub>2</sub>=CH<sub>3</sub>  
**142** R<sub>1</sub>=R<sub>2</sub>=H

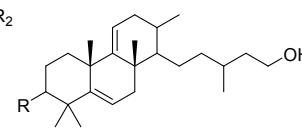

**143** R=OCO(CH<sub>2</sub>)<sub>8</sub>CH<sub>3</sub>

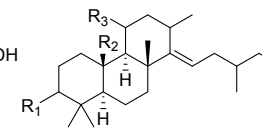

**144** R<sub>1</sub>=H; R<sub>2</sub>=COOH; R<sub>3</sub>=OH  
**145** R<sub>1</sub>=OGlc; R<sub>2</sub>=CH<sub>3</sub>; R<sub>3</sub>=H

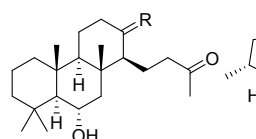

**146** R=CH<sub>2</sub>  
**147** R=O

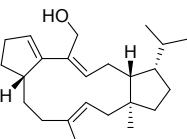

**148**

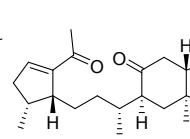

**149** R=β-H  
**150** R=α-H

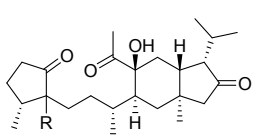

**151** R=β-H  
**152** R=α-H

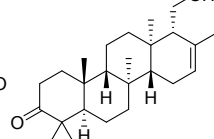

**153**

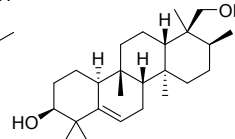

**154**

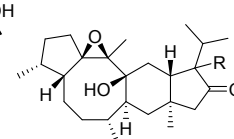

**155** R=β-H  
**160** R=α-H

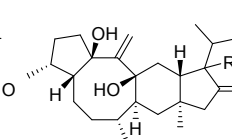

**156** R=β-H  
**161** R=α-H

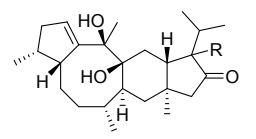

**157** R=β-H  
**162** R=α-H

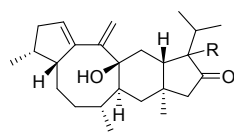

**158** R=β-H  
**163** R=α-H

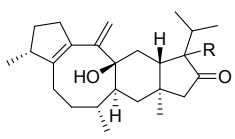

**159** R=β-H  
**164** R=α-H

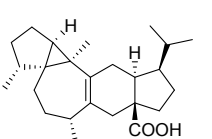

**165**

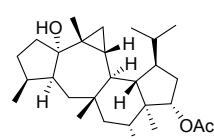

**166**

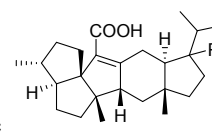

**167** R=β-H  
**170** R=α-H

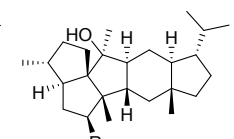

**168** R=H  
**169** R=OH

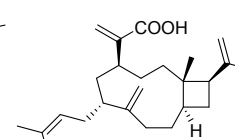

**178**

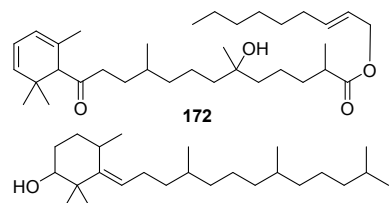

**171**

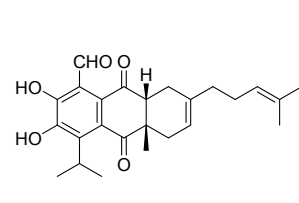

**172**

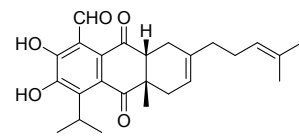

**173**

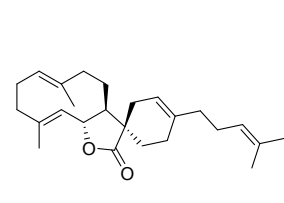

**174**

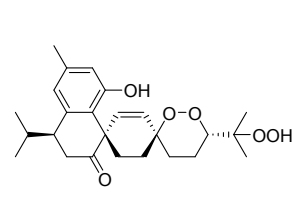

**175**

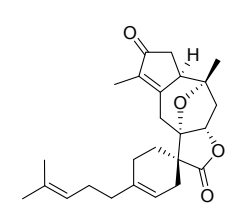

**176**

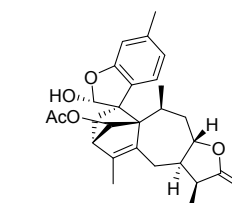

**177**

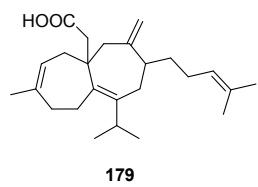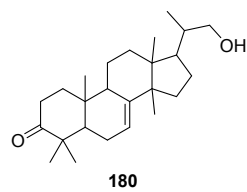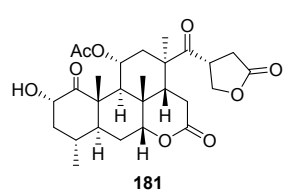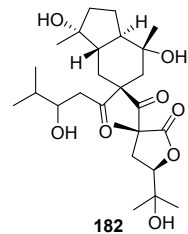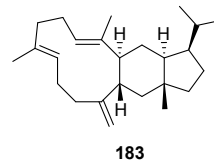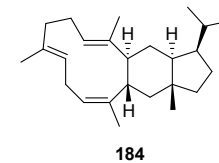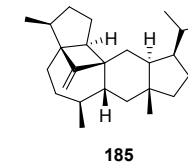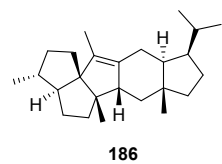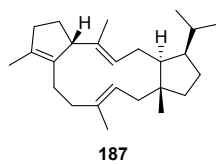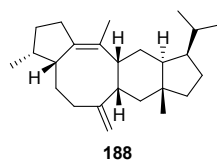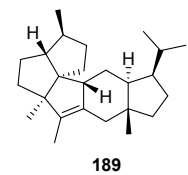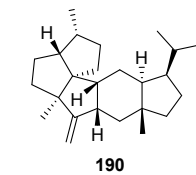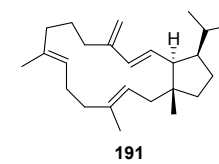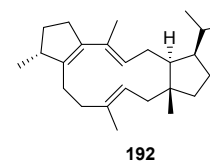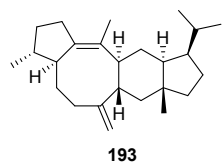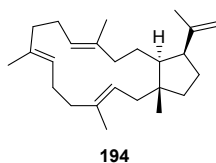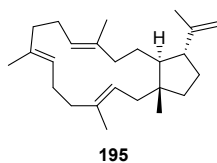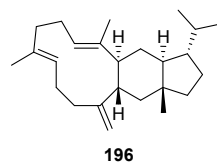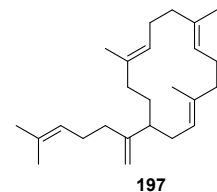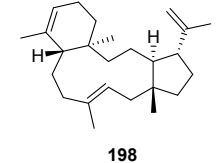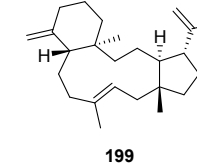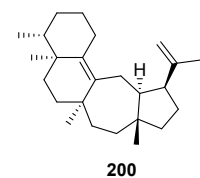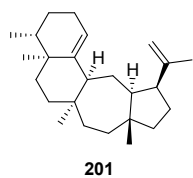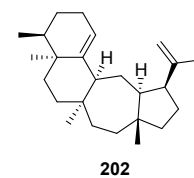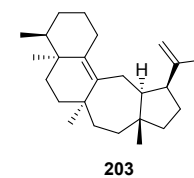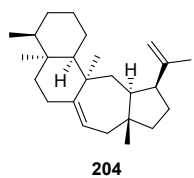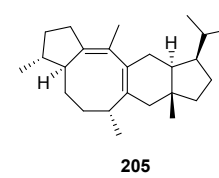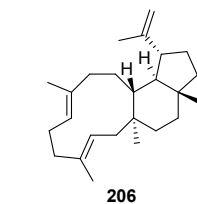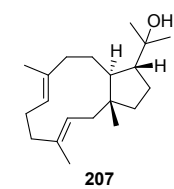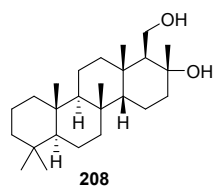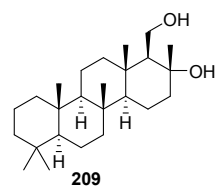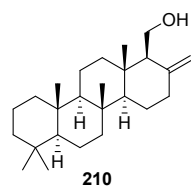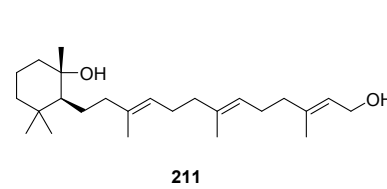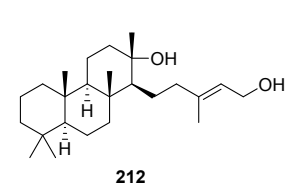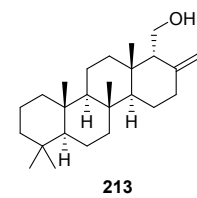

**Table S1. Names, Sources and Bioactivities of the Compounds**

| <b>Com.</b> | <b>Names</b>                                                                 | <b>Sources</b>                                    | <b>Bioactivities</b>                      |
|-------------|------------------------------------------------------------------------------|---------------------------------------------------|-------------------------------------------|
| 1           | (2Z,6Z,10E,14E)-geranylarnesol                                               | <i>Triticum aestivum</i> (Gramineae)              |                                           |
| 2           | (2E)-3,7,11,15,19-pentamethyleicos-2-1-ol                                    | <i>Croton hieronymi</i> (Euphorbiaceae)           |                                           |
| 3           | (2Z,6E)-3,7,11,15,19-pentamethyleicosa-2,6-dien-1-ol                         | <i>Solanum tuberosum</i> (Solanaceae)             |                                           |
| 4           | 2,6,10,14-tetramethyl-18-butanecarboxymethylene-henecos-12-en-17 $\beta$ -ol | <i>Oryza sativa</i> (Gramineae)                   |                                           |
| 5           | myrrha-sesterterpenyl piperonylate                                           | <i>Commiphora myrrha</i> (Burseraceae)            |                                           |
| 6           | aegleosesterterpenoid                                                        | <i>Aegle marmelos</i> (Rutaceae)                  |                                           |
| 7           | coleifolide A                                                                | <i>Scutellaria coleifolia</i> (Lamiaceae)         | cytotoxicity                              |
| 8           | coleifolide B                                                                | <i>Scutellaria coleifolia</i> (Lamiaceae)         | cytotoxicity                              |
| 9           | aegleonorsesterterpentriene                                                  | <i>Aegle marmelos</i> (Rutaceae)                  |                                           |
| 10          | woodwardinocide                                                              | <i>Woodwardia virginica</i> (fern of Blechnaceae) |                                           |
| 11          | leucosceptroid A                                                             | <i>Leucosceptrum canum</i> (Lamiaceae)            | antifeedant activity; antifungal activity |
| 12          | leucosceptroid B                                                             | <i>Leucosceptrum canum</i> (Lamiaceae)            | antifeedant activity; antifungal activity |
| 13          | leucosceptroid E                                                             | <i>Leucosceptrum canum</i> (Lamiaceae)            |                                           |
| 14          | leucosceptroid F                                                             | <i>Leucosceptrum canum</i> (Lamiaceae)            |                                           |
| 15          | leucosceptroid G                                                             | <i>Leucosceptrum canum</i> (Lamiaceae)            | antifeedant activity                      |
| 16          | leucosceptroid H                                                             | <i>Leucosceptrum canum</i> (Lamiaceae)            |                                           |
| 17          | leucosceptroid I                                                             | <i>Leucosceptrum canum</i> (Lamiaceae)            |                                           |
| 18          | leucosceptroid J                                                             | <i>Leucosceptrum canum</i> (Lamiaceae)            |                                           |
| 19          | leucosceptroid K                                                             | <i>Leucosceptrum canum</i> (Lamiaceae)            |                                           |
| 20          | leucosceptroid L                                                             | <i>Leucosceptrum canum</i> (Lamiaceae)            |                                           |

| <b>Com.</b> | <b>Names</b>                       | <b>Sources</b>                                                                                          | <b>Bioactivities</b>                      |
|-------------|------------------------------------|---------------------------------------------------------------------------------------------------------|-------------------------------------------|
| 21          | leucosceptroid M                   | <i>Leucosceptrum canum</i> (Lamiaceae)                                                                  |                                           |
| 22          | leucosceptroid N                   | <i>Leucosceptrum canum</i> (Lamiaceae)                                                                  | antifeedant activity                      |
| 23          | leucosceptroid O                   | <i>Leucosceptrum canum</i> (Lamiaceae)                                                                  | antifeedant activity                      |
| 24          | leucosceptroid P                   | <i>Leucosceptrum canum</i> (Lamiaceae)                                                                  |                                           |
| 25          | leucosceptroid Q                   | <i>Leucosceptrum canum</i> (Lamiaceae)                                                                  |                                           |
| 26          | norleucosceptroid D                | <i>Leucosceptrum canum</i> (Lamiaceae)                                                                  | antifeedant activity                      |
| 27          | norleucosceptroid E                | <i>Leucosceptrum canum</i> (Lamiaceae)                                                                  | antifeedant activity                      |
| 28          | norleucosceptroid A                | <i>Leucosceptrum canum</i> (Lamiaceae)                                                                  | antifeedant activity                      |
| 29          | norleucosceptroid B                | <i>Leucosceptrum canum</i> (Lamiaceae)                                                                  | antifeedant activity                      |
| 30          | norleucosceptroid C                | <i>Leucosceptrum canum</i> (Lamiaceae)                                                                  | antifeedant activity                      |
| 31          | norleucosceptroid F                | <i>Leucosceptrum canum</i> (Lamiaceae)                                                                  | antifeedant activity                      |
| 32          | norleucosceptroid G                | <i>Leucosceptrum canum</i> (Lamiaceae)                                                                  |                                           |
| 33          | norleucosceptroid H                | <i>Leucosceptrum canum</i> (Lamiaceae)                                                                  |                                           |
| 34          | leucosceptrine                     | <i>Leucosceptrum canum</i> (Lamiaceae)                                                                  | prolylendopeptidase inhibitory activity   |
| 35          | 17 $\alpha$ -hydroxyleucosceptrine | <i>Leucosceptrum canum</i> (Lamiaceae)                                                                  |                                           |
| 36          | leucosesterlactone                 | <i>Leucosceptrum canum</i> (Lamiaceae)                                                                  | prolylendopeptidase inhibitory activity   |
| 37          | colquhounoid B                     | <i>Colquhounia coccinea</i> var. <i>mollis</i> (Lamiaceae)                                              | antifeedant activity; antifungal activity |
| 38          | colquhounoid C                     | <i>Colquhounia coccinea</i> var. <i>mollis</i> (Lamiaceae)                                              | antifeedant activity                      |
| 39          | norcolquhounoid C                  | <i>Colquhounia coccinea</i> var. <i>mollis</i> (Lamiaceae)                                              | immunosuppressive activity                |
| 40          | norcolquhounoid D                  | <i>Colquhounia coccinea</i> var. <i>mollis</i> (Lamiaceae)                                              | immunosuppressive activity                |
| 41          | salvileucolide methylester         | <i>Salvia hypoleuca</i> ; <i>S. sahendica</i> ; <i>S. lachnocalyx</i> ; <i>S. tingitana</i> (Lamiaceae) | antibacterial activity                    |



| Com. | Names                                                                                                         | Sources                                                  | Bioactivities                      |
|------|---------------------------------------------------------------------------------------------------------------|----------------------------------------------------------|------------------------------------|
| 42   | none                                                                                                          | <i>Salvia hypoleuca</i> (Lamiaceae)                      |                                    |
| 43   | none                                                                                                          | <i>Salvia hypoleuca</i> (Lamiaceae)                      |                                    |
| 44   | none                                                                                                          | <i>Salvia hypoleuca</i> (Lamiaceae)                      |                                    |
| 45   | salvisyriacolide                                                                                              | <i>Salvia syriaca</i> (Lamiaceae)                        |                                    |
| 46   | salvimirzacolide                                                                                              | <i>Salvia mirzayanii</i> (Lamiaceae)                     |                                    |
| 47   | 8 $\alpha$ ,13,14- <i>threo</i> -trihydroxy-labd-15,17-dien-16,19-olide-23-oic acid                           | <i>Salvia palaestina</i> (Lamiaceae)                     |                                    |
| 48   | 8 $\alpha$ ,13,14- <i>erythro</i> -trihydroxy-labd-15,17-dien-16,19-olide-23-oic acid                         | <i>Salvia palaestina</i> (Lamiaceae)                     |                                    |
| 49   | 3 $\beta$ ,8 $\alpha$ ,13,14- <i>erythro</i> -tetrahydroxy-labd-15,17-dien-16,19-olide                        | <i>Salvia palaestina</i> (Lamiaceae)                     |                                    |
| 50   | 6 $\alpha$ ,8 $\alpha$ ,15( <i>S</i> ),23-tetrahydroxy-labd-13(14),17-dien-16( <i>S</i> ),19-olide            | <i>Salvia dominica</i> ; <i>S. tingitana</i> (Lamiaceae) | inhibiting tubulin-tyrosine ligase |
| 51   | 6 $\alpha$ ,8 $\alpha$ ,23-trihydroxy-labd-13(14),17-dien-16( <i>R</i> ),19-olide                             | <i>Salvia dominica</i> (Lamiaceae)                       | inhibiting tubulin-tyrosine ligase |
| 52   | 6 $\alpha$ ,8 $\alpha$ ,15( <i>S</i> )-trihydroxy-labd-13(14),17-dien-16( <i>S</i> ),19-olide                 | <i>Salvia dominica</i> (Lamiaceae)                       |                                    |
| 53   | 6 $\alpha$ ,8 $\alpha$ ,15( <i>S</i> )-trihydroxy-23-carbossi-labd-13(14),17-dien-16( <i>S</i> ),19-olide     | <i>Salvia dominica</i> (Lamiaceae)                       | inhibiting tubulin-tyrosine ligase |
| 54   | 6 $\alpha$ ,8 $\alpha$ -dihydroxy-23-carbossi-labd-13(14),17-dien-16,19-olide                                 | <i>Salvia dominica</i> (Lamiaceae)                       | inhibiting tubulin-tyrosine ligase |
| 55   | 6 $\alpha$ ,8 $\alpha$ ,15( <i>S</i> )-trihydroxy-23-carbossimethylabd-13(14),17-dien-16( <i>S</i> ),19-olide | <i>Salvia dominica</i> ; <i>S. tingitana</i> (Lamiaceae) | inhibiting tubulin-tyrosine ligase |
| 56   | 6 $\alpha$ ,8 $\alpha$ ,15( <i>S</i> )-trihydroxy-23- <i>oxo</i> -labd-13(14),17-dien-16( <i>S</i> ),19-olide | <i>Salvia dominica</i> (Lamiaceae)                       | inhibiting tubulin-tyrosine ligase |
| 57   | 6 $\alpha$ ,8 $\alpha$ -dihydroxy-23- <i>oxo</i> -labd-13(14),17-dien-16( <i>R</i> ),19-olide                 | <i>Salvia dominica</i> (Lamiaceae)                       | inhibiting tubulin-tyrosine ligase |
| 58   | 6 $\alpha$ ,8 $\alpha$ ,23-trihydroxy-labd-13(14),15,17-trien-16,19-olide                                     | <i>Salvia dominica</i> (Lamiaceae)                       | inhibiting tubulin-tyrosine ligase |

| Com. | Names                                                                                            | Sources                             | Bioactivities                      |
|------|--------------------------------------------------------------------------------------------------|-------------------------------------|------------------------------------|
| 59   | 6 $\alpha$ ,8 $\alpha$ -dihydroxy-23-carbossi-labd-13(14),15,17-trien-16,19-olide                | <i>Salvia dominica</i> (Lamiaceae)  | inhibiting tubulin-tyrosine ligase |
| 60   | 6 $\alpha$ ,8 $\alpha$ -dihydroxy-23-oxo-13(14),15,17-trien-16,19-olide                          | <i>Salvia dominica</i> (Lamiaceae)  | inhibiting tubulin-tyrosine ligase |
| 61   | 6 $\alpha$ ,8 $\alpha$ ,23,14,15- <i>threo</i> -pentahydroxy-labd-13(21),17-dien-16,19-olide     | <i>Salvia dominica</i> (Lamiaceae)  |                                    |
| 62   | 6 $\alpha$ ,8 $\alpha$ ,23,14,15- <i>erythro</i> -pentahydroxy-labd-13(21),17-dien-16,19-olide   | <i>Salvia dominica</i> (Lamiaceae)  |                                    |
| 63   | 6 $\alpha$ ,8 $\alpha$ ,14,15- <i>threo</i> -tetrahydroxy-23-oxo-labd-13(21),17-dien-16,19-olide | <i>Salvia dominica</i> (Lamiaceae)  |                                    |
| 64   | 6 $\alpha$ ,15( <i>S</i> ),23-trihydroxy-labd-8(22),13(14),17-trien-16( <i>S</i> ),19-olide      | <i>Salvia dominica</i> (Lamiaceae)  | inhibiting tubulin-tyrosine ligase |
| 65   | 6 $\alpha$ ,15( <i>S</i> )-dihydroxy-23-oxo-labd-8(22),13(14),17-trien-16( <i>S</i> ),19-olide   | <i>Salvia dominica</i> (Lamiaceae)  | inhibiting tubulin-tyrosine ligase |
| 66   | none                                                                                             | <i>Salvia dominica</i> (Lamiaceae)  |                                    |
| 67   | none                                                                                             | <i>Salvia dominica</i> (Lamiaceae)  |                                    |
| 68   | (13 <i>E</i> )-8 $\alpha$ -hydroxy-23-carboxymethylabd-13(14),17(18)-dien-16,19-olide            | <i>Salvia tingitana</i> (Lamiaceae) |                                    |
| 69   | (13 <i>E</i> )-8 $\alpha$ ,15-dihydroxy-23-carboxymethylabd-13(14),17(18)-dien-16,19-olide       | <i>Salvia tingitana</i> (Lamiaceae) |                                    |
| 70   | (13 <i>E</i> )-8 $\alpha$ ,23-dihydroxyabd-13(14),17(18)-dien-16,19-olide                        | <i>Salvia tingitana</i> (Lamiaceae) |                                    |
| 71   | (13 <i>E</i> )-labd-13(14),17(18)-dien-8 $\alpha$ ,16,19-triol                                   | <i>Salvia tingitana</i> (Lamiaceae) |                                    |
| 72   | 15,16-dehydrosalvileucolide-6,23-lactone-trans-epoxide                                           | <i>Salvia hypoleuca</i> (Lamiaceae) |                                    |
| 73   | none                                                                                             | <i>Salvia hypoleuca</i> (Lamiaceae) |                                    |
| 74   | none                                                                                             | <i>Salvia hypoleuca</i> (Lamiaceae) |                                    |
| 75   | 14-hydroperoxy-13(21)-dehydro-13,14-dihydrosalvileucolide-6,23-lactone                           | <i>Salvia hypoleuca</i> (Lamiaceae) |                                    |

| Com. | Names                                                                                                                               | Sources                                                                                                 | Bioactivities                      |
|------|-------------------------------------------------------------------------------------------------------------------------------------|---------------------------------------------------------------------------------------------------------|------------------------------------|
| 76   | salvileucolide-6,23-lactone                                                                                                         | <i>Salvia hypoleuca</i> ; <i>S. sahendica</i> ; <i>S. lachnocalyx</i> ; <i>S. tingitana</i> (Lamiaceae) |                                    |
| 77   | 23,6 $\alpha$ -epoxy-labd-8,13(14),17-trien-16( <i>R</i> ),19-olide                                                                 | <i>Salvia dominica</i> (Lamiaceae)                                                                      | inhibiting tubulin-tyrosine ligase |
| 78   | 8 $\alpha$ ,15( <i>S</i> )-dihydroxy-23,6 $\alpha$ -epoxy-labd-13(14),17-dien-16( <i>S</i> ),19-olide                               | <i>Salvia dominica</i> (Lamiaceae)                                                                      |                                    |
| 79   | 8 $\alpha$ ,15( <i>S</i> )-dihydroxylabd-13(14),17-dien-23,6 $\alpha$ -16( <i>S</i> ),19-diolide                                    | <i>Salvia dominica</i> (Lamiaceae)                                                                      |                                    |
| 80   | 8 $\alpha$ ,15( <i>S</i> ),23 $\alpha$ -trihydroxy-23,6 $\alpha$ -epoxy-labd-13(14),17-dien-16( <i>S</i> ),19-olide                 | <i>Salvia dominica</i> (Lamiaceae)                                                                      | inhibiting tubulin-tyrosine ligase |
| 81   | 8 $\alpha$ ,15( <i>S</i> )-dihydroxy,23 $\alpha$ - <i>O</i> -ethyl-23,6 $\alpha$ -epoxy-labd-13(14),17-dien-16( <i>S</i> ),19-olide | <i>Salvia dominica</i> (Lamiaceae)                                                                      | inhibiting tubulin-tyrosine ligase |
| 82   | 8 $\alpha$ -hydroxy,23 $\alpha$ - <i>O</i> -ethyl-23,6 $\alpha$ -epoxy-labd-13(14),17-dien-16( <i>R</i> ),19-olide                  | <i>Salvia dominica</i> (Lamiaceae)                                                                      | inhibiting tubulin-tyrosine ligase |
| 83   | 8 $\alpha$ -hydroxylabd-13(14),15,17-trien-6 $\alpha$ ,23-16,19-diolide                                                             | <i>Salvia dominica</i> (Lamiaceae)                                                                      | inhibiting tubulin-tyrosine ligase |
| 84   | 8 $\alpha$ -23-dihydroxy-23,6 $\alpha$ -epoxy-labd-13(14),15,17-trien-16,19-olide                                                   | <i>Salvia dominica</i> (Lamiaceae)                                                                      | inhibiting tubulin-tyrosine ligase |
| 85   | lachnocalyxolide A                                                                                                                  | <i>Salvia lachnocalyx</i> ; <i>S. deserta</i> (Lamiaceae)                                               |                                    |
| 86   | lachnocalyxolide B                                                                                                                  | <i>Salvia lachnocalyx</i> (Lamiaceae)                                                                   |                                    |
| 87   | none                                                                                                                                | <i>Salvia deserta</i> (Lamiaceae)                                                                       |                                    |
| 88   | (13 <i>E</i> )-8 $\alpha$ -hydroxy-23 $\alpha$ - <i>O</i> -methyl-23,6 $\alpha$ -epoxylabd-13(14),17-(18)-dien-16,19-olide          | <i>Salvia tingitana</i> (Lamiaceae)                                                                     |                                    |
| 89   | (13 <i>E</i> )-8 $\alpha$ ,15-dihydroxy-23 $\alpha$ - <i>O</i> -methyl-23,6 $\alpha$ -epoxylabd-13(14),17(18)-dien-16,19-olide      | <i>Salvia tingitana</i> (Lamiaceae)                                                                     |                                    |
| 90   | (13 <i>E</i> )-8 $\alpha$ ,23 $\alpha$ -dihydroxy-23,6 $\alpha$ -epoxylabd-13(14),17(18)-dien-16,19-olide                           | <i>Salvia tingitana</i> (Lamiaceae)                                                                     |                                    |
| 91   | salvidominicolide A                                                                                                                 | <i>Salvia dominica</i> (Lamiaceae)                                                                      |                                    |
| 92   | salvidominicolide B                                                                                                                 | <i>Salvia dominica</i> (Lamiaceae)                                                                      |                                    |

| Com. | Names                                                                                                                                                | Sources                               | Bioactivities |
|------|------------------------------------------------------------------------------------------------------------------------------------------------------|---------------------------------------|---------------|
| 93   | 8 $\alpha$ -hydroxy-13-hydroperoxylabd-14,17-dien-19,16;23,6 $\alpha$ -diolide                                                                       | <i>Salvia sahendica</i> (Lamiaceae)   |               |
| 94   | none                                                                                                                                                 | <i>Salvia deserta</i> (Lamiaceae)     |               |
| 95   | salviaethiopolide                                                                                                                                    | <i>Salvia aethiopis</i> (Lamiaceae)   |               |
| 96   | 13- <i>epi</i> -salviaethiopolide                                                                                                                    | <i>Salvia aethiopis</i> (Lamiaceae)   |               |
| 97   | yosgadensolide A                                                                                                                                     | <i>Salvia yosgadensis</i> (Lamiaceae) |               |
| 98   | yosgadensolide B                                                                                                                                     | <i>Salvia yosgadensis</i> (Lamiaceae) |               |
| 99   | 6 $\alpha$ ,14-dihydroxymanoyloxide-15,17-dien-15( <i>E</i> )-16,19-olide                                                                            | <i>Salvia yosgadensis</i> (Lamiaceae) |               |
| 100  | 6 $\alpha$ ,14-dihydroxy-13- <i>epi</i> -manoyloxide-15,17-dien-16,19-olide                                                                          | <i>Salvia yosgadensis</i> (Lamiaceae) |               |
| 101  | 6 $\alpha$ ,16-dihydroxymanoyloxide-13- <i>epi</i> -14,17-dien-16,19-olide                                                                           | <i>Salvia yosgadensis</i> (Lamiaceae) |               |
| 102  | (4 <i>R</i> ,5 <i>R</i> ,8 <i>R</i> ,9 <i>R</i> ,10 <i>S</i> ,13 <i>S</i> ,14 <i>S</i> )-14-hydroxymanoyloxide-15,17-dien-15( <i>Z</i> )-16,19-olide | <i>Salvia mirzayanii</i> (Lamiaceae)  |               |
| 103  | (4 <i>R</i> ,5 <i>R</i> ,8 <i>R</i> ,9 <i>R</i> ,10 <i>S</i> ,13 <i>R</i> ,14 <i>S</i> )-14-hydroxymanoyloxide-15,17-dien-15( <i>Z</i> )-16,19-olide | <i>Salvia mirzayanii</i> (Lamiaceae)  |               |
| 104  | (4 <i>R</i> ,5 <i>R</i> ,8 <i>R</i> ,9 <i>R</i> ,10 <i>S</i> ,13 <i>S</i> ,14 <i>R</i> )-14-hydroxymanoyloxide-15,17-dien-15( <i>Z</i> )-16,19-olide | <i>Salvia mirzayanii</i> (Lamiaceae)  |               |
| 105  | (4 <i>R</i> ,5 <i>R</i> ,8 <i>R</i> ,9 <i>R</i> ,10 <i>S</i> ,13 <i>S</i> ,16 <i>R</i> )-14-hydroxymanoyloxide-17-en-16,19-olide                     | <i>Salvia mirzayanii</i> (Lamiaceae)  |               |
| 106  | (4 <i>R</i> ,5 <i>R</i> ,8 <i>R</i> ,9 <i>R</i> ,10 <i>S</i> ,13 <i>R</i> )-manoyloxide-15,17-dien-15( <i>Z</i> )-16,19-olide                        | <i>Salvia mirzayanii</i> (Lamiaceae)  |               |
| 107  | lachnocalyxolide C                                                                                                                                   | <i>Salvia lachnocalyx</i> (Lamiaceae) |               |
| 108  | lachnocalyxolide C'                                                                                                                                  | <i>Salvia lachnocalyx</i> (Lamiaceae) |               |
| 109  | (14 <i>E</i> )-methylmanoyloxide-14,16,18-trien-19,16-oxide-23-carboxylate                                                                           | <i>Salvia tingitana</i> (Lamiaceae)   |               |

| Com. | Names                                                                                           | Sources                                                    | Bioactivities                                          |
|------|-------------------------------------------------------------------------------------------------|------------------------------------------------------------|--------------------------------------------------------|
| 110  | (13 <i>E</i> )-4 $\alpha$ ,6 $\alpha$ ,8 $\alpha$ -trihydroxyabd-13(14),17(18)-dien-16,19-olide | <i>Salvia tingitana</i> (Lamiaceae)                        |                                                        |
| 111  | yosgadensonol                                                                                   | <i>Salvia yosgadensis</i> (Lamiaceae)                      |                                                        |
| 112  | 13- <i>epi</i> -yosgadensonol                                                                   | <i>Salvia yosgadensis</i> (Lamiaceae)                      |                                                        |
| 113  | 6-dehydroxy-yosgadensonol                                                                       | <i>Salvia limbata</i> (Lamiaceae)                          |                                                        |
| 114  | 6-dehydroxy-13- <i>epi</i> -yosgadensonol                                                       | <i>Salvia limbata</i> (Lamiaceae)                          |                                                        |
| 115  | 17,18,19,20-tetranor-13- <i>epi</i> -manoyloxide-14-en-16-oic acid-23,6 $\alpha$ -olide         | <i>Salvia sahendica</i> (Lamiaceae)                        |                                                        |
| 116  | leucosceptroid C                                                                                | <i>Leucosceptrum canum</i> (Lamiaceae)                     | antifeedant activity                                   |
| 117  | leucosceptroid D                                                                                | <i>Leucosceptrum canum</i> (Lamiaceae)                     |                                                        |
| 118  | leucosesterterpenone                                                                            | <i>Leucosceptrum canum</i> (Lamiaceae)                     | prolylendopeptidase inhibitory activity                |
| 119  | 14 $\beta$ -methylleucosesterterpenone                                                          | <i>Leucosceptrum canum</i> (Lamiaceae)                     |                                                        |
| 120  | eurysoloid A                                                                                    | <i>Eurysolen gracilis</i> (Lamiaceae)                      | immunosuppressive activity                             |
| 121  | eurysoloid B                                                                                    | <i>Eurysolen gracilis</i> (Lamiaceae)                      | immunosuppressive activity;<br>inhibiting adipogenesis |
| 122  | colquhounoid A                                                                                  | <i>Colquhounia coccinea</i> var. <i>mollis</i> (Lamiaceae) | antifeedant activity; antifungal activity              |
| 123  | colquhounoid D                                                                                  | <i>Colquhounia coccinea</i> var. <i>mollis</i> (Lamiaceae) | immunosuppressive activity                             |
| 124  | 14- <i>epi</i> -colquhounoid D                                                                  | <i>Colquhounia coccinea</i> var. <i>mollis</i> (Lamiaceae) | immunosuppressive activity                             |
| 125  | norcolquhounoid A                                                                               | <i>Colquhounia coccinea</i> var. <i>mollis</i> (Lamiaceae) |                                                        |
| 126  | norcolquhounoid B                                                                               | <i>Colquhounia coccinea</i> var. <i>mollis</i> (Lamiaceae) |                                                        |
| 127  | norcolquhounoid C                                                                               | <i>Colquhounia coccinea</i> var. <i>mollis</i> (Lamiaceae) |                                                        |
| 128  | salvileucolidone                                                                                | <i>Salvia hypoleuca</i> (Lamiaceae)                        |                                                        |

| Com. | Names                                                                  | Sources                                                                                                                                            | Bioactivities                                  |
|------|------------------------------------------------------------------------|----------------------------------------------------------------------------------------------------------------------------------------------------|------------------------------------------------|
| 129  | cheilanthatriol; cheilanthetriol; cheilarinosin                        | <i>Cheilanthes farinosa</i> (fern of Pteridaceae);<br><i>Aleuritopteris khunii</i> (fern of Pteridaceae); <i>A. mexicana</i> (fern of Pteridaceae) |                                                |
| 130  | cheilanthenediol                                                       | <i>Aleuritopteris khunii</i> (fern of Pteridaceae)                                                                                                 |                                                |
| 131  | (17Z)-13,19-epoxycheilanth-17-en-6 $\alpha$ -ol                        | <i>Aleuritopteris mexicana</i> (fern of Pteridaceae)                                                                                               |                                                |
| 132  | (17Z)-cheilantha-13(24),17-diene-6 $\alpha$ ,19-diol                   | <i>Aleuritopteris agetae</i> (fern of Pteridaceae)                                                                                                 |                                                |
| 133  | (17Z)-cheilantha-13(24),17-diene-1 $\beta$ ,6 $\alpha$ ,19-triol       | <i>Aleuritopteris agetae</i> (fern of Pteridaceae)                                                                                                 |                                                |
| 134  | (17Z)-19-acetoxycheilantha-13(24),17-diene-1 $\beta$ ,6 $\alpha$ -diol | <i>Aleuritopteris agetae</i> (fern of Pteridaceae)                                                                                                 |                                                |
| 135  | 24,25- <i>O</i> -diacetylvulgaroside                                   | <i>Cydonia vulgaris</i> (Rosaceae)                                                                                                                 |                                                |
| 136  | 25- <i>O</i> -acetylvulgaroside                                        | <i>Cydonia vulgaris</i> (Rosaceae)                                                                                                                 |                                                |
| 137  | 24- <i>O</i> -acetyl-25- <i>O</i> -cinnamoylvulgaroside                | <i>Cydonia vulgaris</i> (Rosaceae)                                                                                                                 |                                                |
| 138  | 25- <i>O</i> -cinnamoylvulgaroside                                     | <i>Cydonia vulgaris</i> (Rosaceae)                                                                                                                 |                                                |
| 139  | (3 <i>R</i> )-malonyl-(13 <i>S</i> )-hydroxycheilanth-17-en-19-oate    | <i>Aletris farinosa</i> (Nartheciaceae)                                                                                                            |                                                |
| 140  | none                                                                   | <i>Aletris farinosa</i> (Nartheciaceae)                                                                                                            |                                                |
| 141  | none                                                                   | <i>Aletris farinosa</i> (Nartheciaceae)                                                                                                            |                                                |
| 142  | none                                                                   | <i>Aletris farinosa</i> (Nartheciaceae)                                                                                                            |                                                |
| 143  | cachemiridiol                                                          | <i>Aralia cachemirica</i> (Araliaceae)                                                                                                             |                                                |
| 144  | cristasesterterpenoic acid                                             | <i>Caesalpinia crista</i> (Fabaceae)                                                                                                               |                                                |
| 145  | cristasesterterpinol glucoside                                         | <i>Caesalpinia crista</i> (Fabaceae)                                                                                                               |                                                |
| 146  | 17-oxo-18,19-bisnorcheilanth-13(24)-en-6 $\alpha$ -ol                  | <i>Aleuritopteris agetae</i> (fern of Pteridaceae)                                                                                                 |                                                |
| 147  | 13,17-dioxo-18,19,24-trisnorcheilanth-6 $\alpha$ -ol                   | <i>Aleuritopteris agetae</i> (fern of Pteridaceae)                                                                                                 |                                                |
| 148  | nitinol                                                                | <i>Gentianella nitida</i> (Gentianaceae)                                                                                                           | enhancing IL-2 gene expression in human T cell |
| 149  | alborosin                                                              | <i>Gentianella nitida</i> ; <i>G. turkestanorum</i> (Gentianaceae)                                                                                 |                                                |
| 150  | 18- <i>epi</i> -alborosin                                              | <i>Gentianella turkestanorum</i> (Gentianaceae)                                                                                                    | immunosuppressive activity                     |

| <b>Com.</b> | <b>Names</b>                    | <b>Sources</b>                                                     | <b>Bioactivities</b>                           |
|-------------|---------------------------------|--------------------------------------------------------------------|------------------------------------------------|
| 151         | gentianelloid A                 | <i>Gentianella turkestanorum</i> (Gentianaceae)                    | immunosuppressive activity                     |
| 152         | gentianelloid B                 | <i>Gentianella turkestanorum</i> (Gentianaceae)                    | immunosuppressive activity                     |
| 153         | none                            | <i>Aletris farinosa</i> (Nartheciaceae)                            |                                                |
| 154         | none                            | <i>Aletris farinosa</i> (Nartheciaceae)                            |                                                |
| 155         | nitidasin                       | <i>Gentianella nitida</i> ; <i>G. turkestanorum</i> (Gentianaceae) | immunosuppressive activity                     |
| 156         | gentianelloid C                 | <i>Gentianella turkestanorum</i> (Gentianaceae)                    |                                                |
| 157         | gentianelloid D                 | <i>Gentianella turkestanorum</i> (Gentianaceae)                    |                                                |
| 158         | gentianelloid E                 | <i>Gentianella turkestanorum</i> (Gentianaceae)                    |                                                |
| 159         | gentianelloid F                 | <i>Gentianella turkestanorum</i> (Gentianaceae)                    | immunosuppressive activity                     |
| 160         | 18- <i>epi</i> -nitidasin       | <i>Gentianella turkestanorum</i> (Gentianaceae)                    |                                                |
| 161         | 18- <i>epi</i> -gentianelloid C | <i>Gentianella turkestanorum</i> (Gentianaceae)                    |                                                |
| 162         | 18- <i>epi</i> -gentianelloid D | <i>Gentianella turkestanorum</i> (Gentianaceae)                    |                                                |
| 163         | 18- <i>epi</i> -gentianelloid E | <i>Gentianella turkestanorum</i> (Gentianaceae)                    |                                                |
| 164         | 18- <i>epi</i> -gentianelloid F | <i>Gentianella turkestanorum</i> (Gentianaceae)                    |                                                |
| 165         | aspterpenacid C                 | <i>Swertia bimaculata</i> (Gentianaceae)                           | inhibiting NO production and HIV-1 replication |
| 166         | gypmacrophin A                  | <i>Gypsoplaca macrophylla</i> (lichen of Gypsoplacaceae)           | inhibiting acetylcholinesterase                |
| 167         | retigeranic acid A              | <i>Lobaria retigera</i> (lichen of Lobariaceae)                    |                                                |
| 168         | retigeran-11-ol                 | <i>Leprocaulon microscopicum</i> (lichen of Leprocaulaceae)        |                                                |
| 169         | 4-hydroxyretigeran-11-ol        | <i>Leprocaulon microscopicum</i> (lichen of Leprocaulaceae)        |                                                |
| 170         | retigeranic acid B              | <i>Lobaria retigera</i> (lichen of Lobariaceae)                    |                                                |
| 171*        | none                            | <i>Aralia cachemirica</i> (Araliaceae)                             |                                                |
| 172*        | none                            | <i>Hemidesmus indicus</i> (Asclepiadaceae)                         |                                                |

| Com. | Names                                  | Sources                                                                                                                                                             | Bioactivities |
|------|----------------------------------------|---------------------------------------------------------------------------------------------------------------------------------------------------------------------|---------------|
| 173* | heliocide H <sub>2</sub>               | <i>Gossypium hirsutum</i> (Malvaceae)                                                                                                                               |               |
| 174* | genepolide                             | <i>Artemisia umbelliformis</i> (Asteraceae)                                                                                                                         |               |
| 175* | involudispirone A                      | <i>Stahlianthus involucratus</i> (Zingiberaceae)                                                                                                                    |               |
| 176* | hedyosulide                            | <i>Hedyosmum brasiliense</i> (Chloranthaceae)                                                                                                                       |               |
| 177* | dibritannilactone A                    | <i>Inula britannica</i> (Asteraceae)                                                                                                                                |               |
| 178* | raoulic acid                           | <i>Raoulia australis</i> (Asteraceae)                                                                                                                               |               |
| 179* | goniocarpic acid                       | <i>Serjania goniocarpa</i> (Sapindaceae)                                                                                                                            |               |
| 180* | phellogine                             | <i>Phellodendron chinense</i> var. <i>glabriusculum</i><br>(Rutaceae)                                                                                               |               |
| 181* | simarolide                             | <i>Simaruha amara</i> (Simaroubaceae)                                                                                                                               |               |
| 182* | biyoulactone D                         | <i>Hypericum chinense</i> (Clusiaceae)                                                                                                                              |               |
| 183  | (+)-thalianatriene; (+)-arathanatriene | <i>At</i> -TPS18 from <i>Arabidopsis thaliana</i>                                                                                                                   |               |
| 184  | (-)-caprutriene                        | Cr237 from <i>Capsella rubella</i>                                                                                                                                  |               |
| 185  | (+)-astellatene                        | <i>At</i> -TPS30 from <i>Arabidopsis thaliana</i>                                                                                                                   |               |
| 186  | (-)-retigeranin B                      | <i>At</i> -TPS19 from <i>Arabidopsis thaliana</i>                                                                                                                   |               |
| 187  | (-)-variculartriene A                  | <i>At</i> -TPS25 from <i>Arabidopsis thaliana</i>                                                                                                                   |               |
| 188  | (-)-aleurodiscalene A                  | Bo250 from <i>Brassica oleracea</i>                                                                                                                                 |               |
| 189  | (-)- <i>ent</i> -quiannulatene         | <i>At</i> -TPS25 from <i>Arabidopsis thaliana</i>                                                                                                                   |               |
| 190  | (+)-boleracene                         | Bo250 from <i>Brassica oleracea</i>                                                                                                                                 |               |
| 191  | (-)-fusaproliferene                    | <i>At</i> -TPS19 <sup>Y428D</sup> from <i>Arabidopsis thaliana</i>                                                                                                  |               |
| 192  | (-)-variculatriene B                   | <i>At</i> -TPS19 <sup>Y428D</sup> from <i>Arabidopsis thaliana</i>                                                                                                  |               |
| 193  | (+)-aleurodiscalene B                  | <i>At</i> -TPS19 <sup>Y428D</sup> from <i>Arabidopsis thaliana</i>                                                                                                  |               |
| 194  | (+)-brassitetraene A                   | <i>At</i> -TPS17 from <i>Arabidopsis thaliana</i> ; Br580 from<br><i>Brassica rapa</i> , Cr089 from <i>Capsella rubella</i> ; Cst725<br>from <i>Camelina sativa</i> |               |



| <b>Com.</b> | <b>Names</b>                                       | <b>Sources</b>                                                                                                                                                | <b>Bioactivities</b> |
|-------------|----------------------------------------------------|---------------------------------------------------------------------------------------------------------------------------------------------------------------|----------------------|
| 195         | (+)-brassitetraene B                               | <i>At</i> -TPS17 from <i>Arabidopsis thaliana</i> ; Br580 from <i>Brassica rapa</i> , Cr089 from <i>Capsella rubella</i> ; Cst725 from <i>Camelina sativa</i> |                      |
| 196         | none                                               | <i>At</i> -TPS18 <sup>F496C</sup> , <i>At</i> -TPS18 <sup>F496S</sup> and <i>At</i> -TPS18 <sup>F496H</sup> from <i>Arabidopsis thaliana</i>                  |                      |
| 197         | none                                               | <i>At</i> -TPS18 <sup>F496C</sup> , <i>At</i> -TPS18 <sup>F496S</sup> and <i>At</i> -TPS18 <sup>F496H</sup> from <i>Arabidopsis thaliana</i>                  |                      |
| 198         | (-)-caprutriene B                                  | Cr089 from <i>Capsella rubella</i>                                                                                                                            |                      |
| 199         | (+)-caprutriene C                                  | Cr089 from <i>Capsella rubella</i>                                                                                                                            |                      |
| 200         | (-)-caprutriene                                    | Cr089 from <i>Capsella rubella</i>                                                                                                                            |                      |
| 201         | (+)-brarapadiene A                                 | Br580 from <i>Brassica rapa</i> ; Cst725 from <i>Camelina sativa</i>                                                                                          |                      |
| 202         | (-)-brarapadiene B                                 | Br580 from <i>Brassica rapa</i> ; Cst725 from <i>Camelina sativa</i>                                                                                          |                      |
| 203         | (-)-arathanadiene A                                | <i>At</i> -TPS17 from <i>Arabidopsis thaliana</i>                                                                                                             |                      |
| 204         | (-)-arathanadiene B                                | <i>At</i> -TPS17 from <i>Arabidopsis thaliana</i>                                                                                                             |                      |
| 205         | none                                               | <i>At</i> -TPS29 from <i>Arabidopsis thaliana</i>                                                                                                             |                      |
| 206         | none                                               | <i>At</i> -TPS06 from <i>Arabidopsis thaliana</i>                                                                                                             |                      |
| 207*        | (3 <i>E</i> ,7 <i>E</i> )-dolabella-3,7-dien-18-ol | <i>At</i> -TPS06 from <i>Arabidopsis thaliana</i>                                                                                                             |                      |
| 208*        | none                                               | squalene-hopene cyclase from <i>Alicyclobacillus acidocaldarius</i>                                                                                           |                      |
| 209*        | none                                               | squalene-hopene cyclase from <i>Alicyclobacillus acidocaldarius</i>                                                                                           |                      |
| 210*        | none                                               | squalene-hopene cyclase from <i>Alicyclobacillus acidocaldarius</i>                                                                                           |                      |
| 211*        | none                                               | squalene-hopene cyclase from <i>Alicyclobacillus acidocaldarius</i>                                                                                           |                      |

| <b>Com.</b> | <b>Names</b> | <b>Sources</b>                                                      | <b>Bioactivities</b> |
|-------------|--------------|---------------------------------------------------------------------|----------------------|
| 212*        | none         | squalene-hopene cyclase from <i>Alicyclobacillus acidocaldarius</i> |                      |
| 213*        | none         | squalene-hopene cyclase from <i>Alicyclobacillus acidocaldarius</i> |                      |

\* means that the compound is not genuine plant sesterterpenoid.
